# Supplementary material for: Development and Characterization of a Subcutaneous Implant-Related Infection Model in Mice to Test Novel Antimicrobial Treatment Strategies
Source: MDPI journal article supplement (doi:10.3390/biomedicines11010040), 2022-12-24
Supplement: s1 [file s1]

|                                                              |           |      |      | Sx day   | sx day+1       | sx day+1 | sx day+2       | sx day+ 2 | sx day+3       |
|--------------------------------------------------------------|-----------|------|------|----------|----------------|----------|----------------|-----------|----------------|
|                                                              |           |      |      | at night | in the morning | at night | in the morning | at night  | in the morning |
| Timepoint of control                                         |           |      |      |          |                |          |                |           |                |
| behavior/habitude                                            |           |      |      |          |                |          |                |           |                |
| - quiet and attentive                                        |           |      |      | 0        | 0              | 0        | 0              | 0         | 0              |
| huddled/inactive OR hyperactive                              |           |      |      | 2        | 2              | 2        | 2              | 2         | 2              |
| - apathetic= no reaction to stimulus                         |           |      |      | 4        | 4              | 4        | 4              | 4         | 4              |
| breathing                                                    |           |      |      |          |                |          |                |           |                |
| - normal                                                     |           |      |      | 0        | 0              | 0        | 0              | 0         | 0              |
| - increased frequency                                        |           |      |      | 2        | 2              | 2        | 2              | 2         | 2              |
| - very intensive                                             |           |      |      | 3        | 3              | 3        | 3              | 3         | 3              |
| appearance (fur, eyes, skin)                                 |           |      |      |          |                |          |                |           |                |
| - normal                                                     |           |      |      | 0        | 0              | 0        | 0              | 0         | 0              |
| - little dirty, sticky, scurfy fur                           |           |      |      | 1        | 1              | 1        | 1              | 1         | 1              |
| - very dirty, sticky, loss of fur                            |           |      |      | 3        | 3              | 3        | 3              | 3         | 3              |
| faeces/ urine                                                |           |      |      |          |                |          |                |           |                |
| - normal                                                     |           |      |      | 0        | 0              | 0        | 0              | 0         | 0              |
| - abnormal (consistency, amount, colour)                     |           |      |      | 2        | 2              | 2        | 2              | 2         | 2              |
| wound healing                                                |           |      |      |          |                |          |                |           |                |
| - normal                                                     |           |      |      | 0        | 0              | 0        | 0              | 0         | 0              |
| - signs of inflammation (swelling, reddening, temperature.↑) |           |      |      | 1        | 1              | 1        | 1              | 1         | 1              |
| -signs of infection (secretion, +signs of inflammation↑)     |           |      |      | 3        | 3              | 3        | 3              | 3         | 3              |
| Animal number                                                | Sx Weight | -10% | -20% |          |                |          |                |           |                |
|                                                              | g         | g    | g    |          |                |          |                |           |                |
|                                                              | g         | g    | g    |          |                |          |                |           |                |
|                                                              | g         | g    | g    |          |                |          |                |           |                |
|                                                              | g         | g    | g    |          |                |          |                |           |                |
|                                                              | g         | g    | g    |          |                |          |                |           |                |
|                                                              | g         | g    | g    |          |                |          |                |           |                |
|                                                              | g         | g    | g    |          |                |          |                |           |                |
|                                                              |           |      |      |          |                |          |                |           |                |
| Total                                                        |           |      |      |          |                |          |                |           |                |
| Signature                                                    |           |      |      |          |                |          |                |           |                |
